**Comparative genomics of *Alternaria* species provides insights into the pathogenic lifestyle of *Alternaria brassicae* – a pathogen of the *Brassicaceae* family**

**Running title:** Comparative genomics of *Alternaria brassicae*

Sivasubramanian Rajarammohan<sup>1,3</sup>, Kumar Paritosh<sup>2</sup>, Deepak Pental<sup>2</sup>, Jagreet Kaur<sup>1\*</sup>

<sup>1</sup> – Department of Genetics, University of Delhi South Campus, New Delhi, India

<sup>2</sup> – Centre for Genetic Manipulation of Crop Plants, University of Delhi South Campus, New Delhi, India

<sup>3</sup> – Current Address: National Agri-Food Biotechnology Institute, Mohali, India

Corresponding author: Dr. Jagreet Kaur

Department of Genetics,  
University of Delhi South Campus,  
New Delhi - 110021, India  
Contact no.: +91-11-24117329  
Email: jagreet@south.du.ac.in

1 **Abstract**

2 *Alternaria brassicae*, a necrotrophic pathogen, causes *Alternaria* Leaf Spot, one of the  
3 economically important diseases of *Brassica* crops. Many other *Alternaria spp.* such as *A. brassicicola* and  
4 *A. alternata* are known to cause secondary infections in the *A. brassicae*-infected Brassicas. The genome  
5 architecture, pathogenicity factors, and determinants of host-specificity of *A. brassicae* are unknown. In  
6 this study, we annotated and characterised the recently announced genome assembly of *A. brassicae* and  
7 compared it with other *Alternaria spp.* to gain insights into its pathogenic lifestyle. Additionally, we  
8 sequenced the genomes of two *A. alternata* isolates that were co-infecting *B. juncea*. Genome alignments  
9 within the *Alternaria spp.* revealed high levels of synteny between most chromosomes with some  
10 intrachromosomal rearrangements. We show for the first time that the genome of *A. brassicae*, a large-  
11 spored *Alternaria* species, contains a dispensable chromosome. We identified 460 *A. brassicae*-specific  
12 genes, which included many secreted proteins and effectors. Furthermore, we have identified the gene  
13 clusters responsible for the production of Destruxin-B, a known pathogenicity factor of *A. brassicae*. The  
14 study provides a perspective into the unique and shared repertoire of genes within the *Alternaria* genus and  
15 identifies genes that could be contributing to the pathogenic lifestyle of *A. brassicae*.

16  
17 **Keywords:** *Alternaria spp.*, comparative genomics, Destruxin B, dispensable chromosome, necrotroph

18  
19  
20  
21  
22  
23  
24  
25  
26  
27  
28  
29  
30  
31  
32  
33  
34  
35  
36  
37  
38

## 39 Introduction

40 The genus *Alternaria* belonging to the class of *Dothideomycetes* contains many important plant  
41 pathogens. Diseases in the *Brassicaceae* family caused by *Alternaria spp.* result in significant yield losses<sup>1</sup>.  
42 *Alternaria spp.* have a wide host range within the *Brassicaceae*, infecting both the vegetable as well as the  
43 oilseed crops. Some of the most damaging species include *Alternaria brassicae*, *A. brassicicola*, *A.*  
44 *alternata*, *A. raphani*, *A. japonicus*, and *A. tenuissima*. *A. brassicae* preferentially infects the oleiferous  
45 *Brassicacae* while the others are more devastating on the vegetable *Brassicacae*. *A. brassicae* is particularly  
46 more damaging in the hilly regions of the Indian subcontinent, where conducive climatic conditions allow  
47 it to profusely reproduce and cause infections on almost all parts of the plant. Extensive screening for  
48 resistance to *A. brassicae* in the cultivated *Brassica* germplasms has not revealed any source of resistance<sup>2</sup>.

49 The factors that contribute to the pathogenicity of *A. brassicae* are relatively unknown.  
50 Pathogenicity of many *Alternaria spp.* has been mainly attributed to the secretion of host-specific toxins  
51 (HSTs). HSTs induce pathogenesis on a rather narrow species range and are mostly indispensable for  
52 pathogenicity. At least 12 *A. alternata* pathotypes have been reported to produce HSTs and thereby cause  
53 disease on different species<sup>3</sup>. Many of the HST producing genes/gene clusters have been found on  
54 supernumerary chromosomes or dispensable chromosomes<sup>4</sup>. *A. brassicae* has been reported to produce low  
55 molecular weight cyclic depsipeptides named destruxins. Destruxin B is known to be a major phytotoxin  
56 and is reported to be a probable HST of *A. brassicae*<sup>5</sup>. Additionally, a proteinaceous HST (ABR-toxin),  
57 was isolated from the spore germination fluid of *A. brassicae* but was only partially characterised<sup>6,7</sup>.

58 Genome sequencing and comparative analysis can help identify shared and species-specific  
59 pathogenicity factors in closely-related species. Genomic information for nearly 26 *Alternaria spp.*  
60 including *A. brassicae* is currently available and has contributed immensely to clarify the taxonomy of the  
61 *Alternaria* genus<sup>8</sup>. However, comparative analyses to identify pathogenicity factors that confer the ability  
62 to infect a wide range of hosts have not been carried out. Most of the genomic information available for  
63 *Alternaria spp.* has been generated by shotgun sequencing approaches and hence is fragmented. A  
64 contiguous genome assembly is essential, especially when the aim is to identify and characterise  
65 pathogenicity factors or effectors, which are often present in rapidly evolving repeat-rich regions of the  
66 genome<sup>9</sup>. Additionally, contiguous genome assemblies enable an accurate prediction of genes and gene  
67 clusters that are involved in various secondary metabolic processes, many of which are implicated to have  
68 an important role in pathogenicity. Long reads generated from Pacific Biosciences (PacBio) single-  
69 molecule real-time (SMRT) sequencing technology and Oxford Nanopore sequencing technology enable  
70 the generation of high-quality genome assemblies at affordable costs. Besides the recently announced near-  
71 complete genome sequence of *A. brassicae*<sup>10</sup>, three other near-complete genomes of *Alternaria spp.* have  
72 been reported recently<sup>11-13</sup>.

73 *Alternaria* Leaf spot in the field usually occurs as a mixed infection of *A. brassicae* and other  
74 *Alternaria* species, such as *A. brassicicola* and *A. alternata*. It is however not known whether the *A.*  
75 *alternata* infecting *Brassicacae* represent a separate pathotype with a different range of host-specific toxin(s)

76 or are just opportunistic pathogens. We, therefore, carried out Nanopore-based sequencing of two *A.*  
77 *alternata* isolates that were recovered from an *A. brassicae*-infected *B. juncea* plant.

78         Given the invasiveness of *A. brassicae* and the lack of information on its pathogenicity factors, we  
79 undertook the current study to 1) functionally annotate and characterise the recently announced genome of  
80 *A. brassicae*, 2) sequence and analyse the genomes of two *A. alternata* isolates co-infecting *B. juncea* with  
81 respect to the genome of *A. alternata* isolated from very divergent hosts, 3) analyse the repertoire of  
82 CAZymes, secondary metabolite encoding gene clusters, and effectors in *A. brassicae*, and 4) carry out a  
83 comparative analysis of the genomes sequenced in this study with some of the previously sequenced  
84 *Alternaria spp.* genomes to gain insights into their pathogenic lifestyles.

85

## 86 **Materials and Methods**

### 87 **1. Genome Sequencing and assembly**

88         Two isolates of *A. alternata* which were found to be co-infecting *B. juncea* leaves along with *A.*  
89 *brassicae* in our experimental field station at Delhi, India (PN1 and PN2) were isolated and purified by  
90 single spore culture. High molecular-weight genomic DNA was extracted from mycelia of 5-day old  
91 cultures of *A. alternata* isolates using a method described earlier<sup>10</sup>. 2 µg of the high molecular-weight  
92 genomic DNA was used for Nanopore library preparation using LSK-108 ONT ligation protocol. The  
93 libraries were then run on R9.4 SpotON MinION flowcells for 24 hours. Live base calling was enabled for  
94 all the runs. The MinION runs produced 4,14,210 and 2,68,910 reads amounting to 2.36 GB and 1.98 GB  
95 of data for *A. alternata* PN1 and PN2, respectively. The genomes were assembled *de novo* using the Canu  
96 assembler (version 1.6)<sup>14</sup>. Nanopolish was used to compute an improved consensus sequence using the  
97 signal-level raw data for the assemblies.

### 98 **2. mRNA sequencing and transcript reconstruction**

99         Total RNA was isolated from 15-day old fungal mycelia of *A. brassicae*, grown on Potato  
100 Dextrose Agar (PDA) and Radish Root Sucrose Agar (RRSA), using Qiagen RNeasy Plant Mini Kit  
101 following the manufacturer's instructions. 100 bp sequencing libraries were prepared using the TruSeq  
102 Stranded mRNA Library Prep Kit (Illumina). Paired-end sequencing was carried out using Illumina SBS  
103 v4 chemistry on an Illumina Hiseq 2500. The Hiseq run generated 50 million PE reads per sample. The  
104 raw reads were trimmed using Trimmomatic, and the trimmed reads were then mapped to the *de novo*  
105 genome assembly using STAR (version 2.5.0)<sup>15</sup>. Transcripts were reconstructed using Cufflinks (version  
106 2.2.1)<sup>16</sup> and likely coding regions were identified using TransDecoder (version 5.3.0)<sup>17</sup>.

### 107 **3. Gene prediction and annotation**

108         RepeatModeler (version 1.0.11) was used for *de novo* repeat family identification. The *de novo*  
109 identified repeat library was used for masking the genome using RepeatMasker (version 4.0.7). The repeat-  
110 masked genome was used for gene predictions. For gene prediction, multiple lines of gene evidence were  
111 integrated using EVM (EvidenceModeler)<sup>18</sup>. Two *ab initio* gene callers were used viz. AUGUSTUS<sup>19</sup> and  
112 GeneMark-HMM-ES<sup>20</sup>. GeneMark-HMM-ES was self-trained on the repeat-masked genome whereas  
113 AUGUSTUS was trained on the genome and cDNA hints from *A. alternata*. RNA-Seq evidence in the

114 form of coding regions identified by TransDecoder was also used. Additionally, homology-based gene  
115 prediction was carried out using GeMoMa<sup>21</sup> with protein-coding genes of *A. longipes*, *A. arborescens* and  
116 *A. alternata*.

117 Each of these lines of evidence was presented to EVM as separate tracks. In EVM, weights were assigned  
118 to each evidence as follows: AUGUSTUS 1, GeneMark-HMM-ES 1, GeMoMa 1, and RNA-Seq evidence  
119 5. The genes predicted by EVM were used for all the downstream analyses. Genes were then annotated  
120 using BLAST against UniProt, SWISS-PROT, CAZy, MEROPS, and PHI-BASE. The fungal version of  
121 antiSMASH (version 4.0)<sup>22</sup> was used to identify secondary metabolite gene clusters in the genomes.

122 Candidate effector proteins were predicted using the following pipeline: a) SignalP (version 4.1)<sup>23</sup> and  
123 Phobius to identify secreted proteins, b) TMHMM (version 2.0)<sup>24</sup> to remove proteins with transmembrane  
124 domains, c) predGPI to filter out proteins that harbored a GPI membrane-anchoring domain, and d)  
125 EffectorP (version 2.0)<sup>25</sup> to predict potential effectors from the above-filtered protein set.

#### 126 **4. Orthology and whole-genome phylogenetic analysis**

127 The genomes of 16 *Alternaria* species (Supplementary Table 2) were included in the analysis with  
128 *Stemphylium lycopersici* as an outgroup. The proteomes of the fungi were clustered using the Orthofinder  
129 (version 2.2.6)<sup>26</sup> pipeline with default parameters. The clusters were further analysed with Mirlo  
130 (<https://github.com/mthon/mirlo>) to identify phylogenetically informative single copy gene families. These  
131 families were then concatenated into one large alignment and used for phylogenetic analysis. A  
132 phylogenetic tree was constructed using Bayesian MCMC analysis based on the concatenated alignment  
133 under the WAG+I evolutionary model and the gamma distribution calculated using four rate categories and  
134 homogenous rates across the tree. Orthologs were also identified for 13 other pathogenic *Dothideomycetes*  
135 (Supplementary Table 2) for comparative analyses using the same pipeline as above.

#### 136 **5. Relationship of TEs and repeat-rich regions to genes and gene clusters**

137 The overlap of repeat-rich regions and transposable elements (TEs) with i) genes encoding  
138 secreted proteins, ii) effectors and iii) secondary metabolite gene clusters were analysed using the  
139 regioneR<sup>27</sup> package in R. The analysis involved comparison of the overlap of each the above gene sets  
140 with transposable elements and repeat-rich regions with a random set of genes selected from the genome.  
141 A distribution of means was established by running 10,000 permutation tests, which was then used to  
142 calculate a p-value.

143

### 144 **Results and discussion**

#### 145 **1. Genomic features of *A. brassicae* and two other co-infecting *A. alternata* isolates**

146 We sequenced the genomes of two isolates of *A. alternata* (PN1 and PN2) that were co-infecting *B.*  
147 *juncea* with *A. brassicae*. The *A. brassicae* assembly has been previously described<sup>10</sup>. Briefly, the  
148 assembly consisted of nine complete chromosomes and one chromosome with telomeric repeats missing at  
149 one of the ends. Apart from these chromosomes, there were six contigs of which one of them was ~1 Mb in  
150 size, which may together constitute a dispensable chromosome. The N50 of the *A. brassicae* assembly was  
151 2.98 Mb (Table 1). The two isolates co-infecting *B. juncea* were identified to be *A. alternata* based on their

152 ITS and GAPDH sequences. The *A. alternata* assemblies Aat\_PN1 and Aat\_PN2 consisted of 14 contigs  
153 totalling to 33.77 Mb, and 15 contigs totalling to 33.53 Mb, respectively (Table 1). Six contigs in each of  
154 the two assemblies contained telomeric repeats on both ends and therefore, are most likely to represent full  
155 chromosomal molecules. Four other contigs in both the assemblies contained telomeric repeats on one end  
156 but were of similar size of full chromosome molecules as described in *A. solani*<sup>13</sup>. Therefore, the genome  
157 assemblies for *A. alternata* isolates represented ten nearly complete chromosomes each. Whole genome  
158 alignments with related *Alternaria* spp. showed an overall synteny between the genomes with minor  
159 rearrangements. Additionally, mitochondrial sequences were also obtained from the sequencing data for  
160 the two isolates of *A. alternata*. The mitochondrial genomes of the *A. alternata* strains were approximately  
161 49,783 bp and 50,765 bp in size respectively and showed high similarity with the previously published  
162 mitochondrial genome of *A. alternata*<sup>28</sup>.

163 Gene prediction following repeat masking resulted in the identification of 11593, 11495, and 11387  
164 genes in the *A. brassicae*, *A. alternata* PN1, and PN2 genome assemblies, respectively. This was  
165 comparable to the gene numbers estimated in other *Alternaria* spp. (Table 1). BUSCO analysis showed  
166 that the gene models predicted in the three genomes covered 98 % of the single copy conserved fungal  
167 genes indicating near-completeness of the assemblies. The predicted genes were comprehensively  
168 annotated using a combination of databases as described in the Methods section (Figure 1; Supplementary  
169 Table 1). In addition to the three genomes, we also predicted genes *de novo* in the genome assemblies of  
170 three other *Alternaria* species which were sequenced using long-read technologies viz. *A. brassicicola*  
171 (*abra43*)<sup>11</sup>, *A. alternata* (ATCC34957)<sup>12</sup>, and *A. solani* (altNL03003)<sup>13</sup> (Table 1). These six genomes and  
172 their gene predictions were used for the comparative analyses of secondary metabolite encoding gene  
173 clusters and effector-coding genes.

## 174 **2. Phylogenomic analysis assigns a separate clade for the Brassica-infecting *A. brassicae* and *A.*** 175 ***brassicicola* within the *Alternaria* genus**

176 In order to accurately reconstruct the divergence and relationship between *A. brassicae*, the two *A.*  
177 *alternata* isolates (PN1 and PN2), and the other *Alternaria* species, we conducted phylogenomic analyses  
178 using 29 single copy orthologs that had the highest phylogenetic signal as calculated by the program Mirlo.  
179 Selection of genes with higher phylogenetic signals leads to phylogenies that are more congruent with the  
180 species tree<sup>29</sup>. The resulting phylogeny showed that the large-spored *Alternaria* and small-spored  
181 *Alternaria* species clustered separately into two different clades (Figure 2). The *A. alternata* isolates PN1  
182 and PN2 co-infecting Brassicas clustered together with the *A. alternata* isolated from sorghum  
183 (ATCC34957). Interestingly, the two major pathogens of the Brassicas viz. *A. brassicae* and *A.*  
184 *brassicicola* clustered separately from all the other *Alternaria* species, possibly indicating a very different  
185 evolutionary trajectory based on the host preferences of these two species.

## 186 **3. Comparative analyses of *A. alternata* species isolated from different hosts**

187 We compared the genomes of *A. alternata* PN1 and PN2 (isolated from *B. juncea*) to that of *A.*  
188 *alternata* ATCC34957 (isolated from sorghum) to identify any differences in their genomic content that  
189 might allow these to infect two very different species. Whole-genome alignments of *A. alternata* PN1 and

190 PN2 to that of *A. alternata* ATCC34957 revealed very high levels of synteny and the absence of any  
191 species-specific regions. Notably, all the three species did not contain any dispensable chromosomes which  
192 may confer pathogenicity, as has been reported for *A. alternata* isolates infecting many of the fruit crops  
193 such as citrus, pear, and apple<sup>31,32,45</sup>. The gene repertoires of the three species also consisted of similar  
194 number and type of effectors, CAZymes, and secondary metabolite clusters (Table 1). These results  
195 suggest that these isolates of *A. alternata* may be opportunistic secondary pathogens.

#### 196 **4. An abundance of repeat-rich regions and transposable elements in *A. brassicae***

197 Filamentous plant pathogens tend to have a distinct genome architecture with higher repeat content.  
198 Many plant pathogens are known to have a bipartite genome architecture or what is generally known as a  
199 two-speed genome, in which the gene-sparse repeat-rich region provides the raw material for adaptive  
200 evolution<sup>30</sup>. Repeat content estimation and masking using RepeatModeler and RepeatMasker revealed that  
201 the *A. brassicae* genome consisted of ~9.33% repeats as compared to 2.43% and 2.64% repeats in the *A.*  
202 *alternata* genomes. The *A. brassicae* genome harbors the highest repeat content (~9.33%) among all the  
203 *Alternaria* species sequenced till date. However, the genome does not exhibit any bipartite genome  
204 architecture, as reported in some phytopathogens<sup>30</sup>. Our analysis showed that the repeat content differs  
205 significantly between the *A. alternata* isolates and the other pathogenic *Alternaria* species. The pathogenic  
206 *Alternaria* species especially *A. brassicae* and *A. brassicicola* had a considerably larger repertoire of  
207 LTR/Gypsy and LTR/Copia elements (> 8X) in comparison to the other *A. alternata* isolates (pathogenic  
208 and non-pathogenic) (Figure 3). The *A. brassicae* and *A. brassicicola* genomes also had an  
209 overrepresentation of DNA transposons, which amounted to ~5% of the genome, as compared to <1% in  
210 the other *Alternaria* species (Figure 3).

211 This proliferation of repetitive DNA and subsequent evolution of genes overlapping these regions may  
212 be the key to evolutionary success wherein these pathogens have managed to persist over generations of  
213 co-evolutionary conflict with their hosts. Proximity to TEs potentially exposes the genes to RIP-mutations  
214 and therefore accelerated evolution. Ectopic recombination between similar TEs may also result in new  
215 combinations of genes and thereby increase the diversity of proteins or metabolites.

#### 216 **5. Presence of a dispensable chromosome in the large-spored *A. brassicae***

217 Lineage-specific (LS) chromosomes or dispensable chromosomes (DC) have been reported from  
218 several phytopathogenic species including *A. alternata*. DCs in *A. alternata* are known to confer virulence  
219 and host-specificity to the isolate. The whole-genome alignments of *A. brassicae* with other *Alternaria*  
220 spp. revealed that a contig of approx. 1 Mb along with other smaller contigs (66-366 kb) was specific to *A.*  
221 *brassicae* and did not show synteny to any region in the other *Alternaria* spp. However, partial synteny  
222 was observed when the contig was aligned to the sequences of other dispensable chromosomes reported in  
223 *Alternaria* spp.<sup>31,32</sup>. This led us to hypothesize that these contigs together may represent a DC of *A.*  
224 *brassicae*. To confirm this, we searched the contigs for the presence of AaMSAS and ALT1 genes, which  
225 are known marker genes for dispensable chromosomes in *Alternaria* spp.<sup>4</sup>. We found two copies of the  
226 AaMSAS gene as part of two secondary metabolite biosynthetic clusters on the 1 Mb contig. However, we  
227 did not find any homolog of the ALT1 gene. Additionally, the repeat content of the contigs (ABRSC11,



228 scaffold 13, 17, 18, and 19) was compared to the whole genome. The gene content of the lineage-specific  
229 contigs was significantly lower than that of the core chromosomes (Table 2). Conversely, the DC contigs  
230 were highly enriched in TE content as compared to the core chromosomes (Table 2). Although, the DC  
231 was not enriched with genes encoding secreted proteins, the proportion of secreted effector genes was 30%  
232 higher as compared to the core chromosomes. All the above evidence point to the fact that *A. brassicae*  
233 may indeed harbour a DC. DCs in *Alternaria spp.* have been reported so far from only the small-spored  
234 *Alternaria spp.* and no large-spored *Alternaria* species have been known to harbour DCs. It remains to be  
235 seen whether the DC contributes to virulence of *A. brassicae*. Future studies would involve the  
236 characterization of the dispensable chromosome in *A. brassicae* and correlating its presence to the  
237 pathogenicity of different isolates.

## 238 **6. Orthology analysis reveals species-specific genes with putative roles in virulence**

239 Differences in gene content and diversity within genes contribute to adaptation, growth, and  
240 pathogenicity. In order to catalogue the differences in the gene content within the *Alternaria* genus and the  
241 *Dothideomycetes*, we carried out an orthology analysis on the combined set of 360216 proteins from 30  
242 different species (including 16 *Alternaria* species) belonging to *Dothideomycetes* (Supplementary Table 2)  
243 out of which 3,45,321 proteins could be assigned to an orthogroup. We identified 460 *A. brassicae* specific  
244 genes which were present in *A. brassicae* but absent in all other *Alternaria* species (Supplementary Table  
245 3). These species-specific genes included 35 secreted protein coding genes out of which 11 were predicted  
246 to be effectors. Additionally, 20 of these species-specific genes were present on the DC. A large number of  
247 these proteins belonged to the category of uncharacterised proteins with no known function. In order to test  
248 whether these species-specific genes are the result of adaptive evolution taking place in the repeat-rich  
249 regions of the genome, we carried out a permutation test to compare the overlap of repeat-rich regions and  
250 transposable elements with a random gene set against the overlap of these species-specific genes. We  
251 found that these species-specific genes overlapped significantly with repeat-rich regions (P-value: 9.99e-  
252 05; Z-score: -4.825) and transposable elements (P-value: 0.0460; Z-score: 2.539) in the genome.

## 253 **7. Synteny analysis reveals the genetic basis of the exclusivity of Destruxin B production by *A.* 254 *brassicae* within the *Alternaria* genus**

255 The genera of *Alternaria* and *Cochliobolus* are known to be the major producers of host-specific  
256 secondary metabolite toxins. *Alternaria spp.* especially are known for the production of chemically diverse  
257 secondary metabolites, which include the host-specific toxins (HSTs) and non-HSTs. These secondary  
258 metabolites are usually generated by non-ribosomal peptide synthases (NRPS) and polyketide synthases  
259 (PKS). We identified five NRPS type SM gene clusters, 12 PKS type gene clusters and seven terpene-like  
260 gene clusters in *A. brassicae* (Supplementary Table 4). Out of the five NRPS clusters, we could identify  
261 three clusters which produce known secondary metabolites viz. Destruxin B, HC-toxin and  
262 dimethylcoprogen (siderophore).

263 Destruxin B represents a class of cyclic depsipeptides that is known to be one of the key pathogenicity  
264 factors of *A. brassicae* and has been reported to a host-specific toxin of *A. brassicae*<sup>5</sup>. Destruxin B has not  
265 been reported to be produced by any of the other *Alternaria* species. Here we report for the first time the



266 biosynthetic gene cluster responsible for Destruxin B production in *A. brassicae*. The cluster consists of 10  
267 genes, including the major biosynthetic enzyme encoded by an NRPS gene (DtxS1) and the rate-limiting  
268 enzyme, DtxS3 (aldo-keto reductase) (Supplementary Table 4). Interestingly, synteny analysis of this  
269 cluster among the six *Alternaria* species showed that both these genes were not present in any of the other  
270 *Alternaria* spp. although the overall synteny of the cluster was maintained in all of these species (Figure 4).  
271 The absence of the key genes coding for the enzymes DtxS1 and DtxS3 in the Destruxin B cluster in the  
272 other *Alternaria* species explains the absence of Destruxin B in those species.

273 Destruxin B has been reported from the entomopathogen *Metarhizium robertsii*<sup>33</sup>, and *Ophiosphaerella*  
274 *herpotricha*<sup>34</sup>, the cause of spring dead spot of bermudagrass, apart from *A. brassicae*. Wang et al.<sup>35</sup>  
275 described the secondary metabolite biosynthetic cluster responsible for Destruxin production in *M.*  
276 *robertsii*. The evolutionary history of Destruxin B production within the *Metarhizium* genus closely  
277 resembled that of *Alternaria*. The specialist pathogens such as *M. acridum* lack the two key enzymes and  
278 hence do not produce Destruxins. However, *M. robertsii*, a generalist with a wider host range produces  
279 Destruxins<sup>35</sup>. It was therefore hypothesized that Destruxins might be responsible for the establishment of  
280 the extended host range of *M. robertsii*<sup>35</sup>. A similar hypothesis may also be true in the case of *A.*  
281 *brassicae*, which has a broad host range and can infect almost all the *Brassicaceae*. Further experiments to  
282 determine the host range of Destruxin null mutants of *A. brassicae* may help clarify the role of this  
283 important phytotoxin in extending the host range of *A. brassicae*.

284 We also identified a gene cluster responsible for dimethylcoprogen (siderophore) production in *A.*  
285 *brassicae*. Siderophores are iron-chelating compounds, used by fungi to acquire extracellular ferric iron  
286 and have been reported to be involved in fungal virulence<sup>36</sup>. The identification of the gene cluster  
287 responsible for siderophore synthesis would enable the study of siderophores and their role in  
288 pathogenicity in *A. brassicae*. Additionally, we identified an NRPS cluster, possibly coding for HC-toxin  
289 in one of the CDCs (scaffold 18) (Supplementary Table 4). HC-toxin is a known virulence determinant of  
290 the plant pathogen *Cochliobolus carbonum*, which infects maize genotypes that lack a functional copy of  
291 HM1, a carbonyl reductase that detoxifies the toxin<sup>37</sup>. A recent report showed that *A. jesenskae* also could  
292 produce HC-toxin, making it the only other fungus other than *C. carbonum* to produce the toxin<sup>38</sup>. The  
293 presence of the HC-toxin cluster in *A. brassicae* hints towards the possibility of many other species having  
294 the potential to produce HC-toxin outside the *Cochliobolus* genus. Additionally, a PKS type cluster  
295 consisting of 12 genes, responsible for melanin production was also identified (Supplementary Table 4).  
296 The melanin biosynthetic cluster has been described for *A. alternata* previously<sup>39</sup>. Also, the transcription  
297 factor Amr1, which induces melanin production, has been characterized in *A. brassicicola* and is known to  
298 suppress virulence<sup>40</sup>. The role of melanin in virulence is ambiguous. The melanisation of appressoria  
299 contributes to virulence in *Magnaporthe* and *Colletotrichum* species<sup>41</sup>. In the case of *Cochliobolus*  
300 *heterostrophus*, melanin deficient isolates were able to sustain virulence under lab conditions but lost their  
301 virulence in the field<sup>42</sup>. However, melanin production in *A. alternata* has been reported to play no role in  
302 its pathogenicity<sup>43</sup>.

303 The plant pathogens belonging to the genus of *Alternaria* seem to have a dynamic capacity to  
304 acquire new secondary metabolite potential to colonize new ecological niches. The most parsimonious  
305 explanation for this dynamic acquisition of secondary metabolite potential is horizontal gene transfer  
306 within the genus of *Alternaria* and possibly with other genera. There is extensive evidence in the literature  
307 that much of the HSTs of *Alternaria* are carried on the dispensable chromosomes and exchange of these  
308 chromosomes can broaden the host specificity<sup>4,44,45</sup>. Apart from horizontal gene transfer, rapid duplication,  
309 divergence and loss of the SM genes may also contribute to the pathogen evolving new metabolic  
310 capabilities. These processes of duplication and divergence may well be aided by the proximity of the  
311 secondary metabolite clusters to the repeat elements that makes them prone to RIP-mutations. Therefore,  
312 we tested whether the secondary metabolite clusters were also associated with repeat-rich regions. A  
313 permutation test was used to compare the overlap of repeat-rich regions with a random gene set against the  
314 overlap of secondary metabolite cluster genes. The secondary metabolite clusters significantly overlapped  
315 repeat-rich regions as compared to the random gene set (P-value: 0.0017; Z-score: -2.7963). Also, these  
316 clusters overlapped significantly with transposable elements among the repeat-rich regions (P-value:  
317 0.0087; Z-score: 2.9871). This shows that both the mechanisms described above for the acquisition of new  
318 secondary metabolite potential may be possible in the case of *A. brassicae*. Population-scale analyses at the  
319 species and genus level may throw light on the prevalence of these mechanisms within the genus of  
320 *Alternaria*.

## 321 **8. Distinct CAZyme profiles of *A. brassicae* and *A. brassicicola* within the *Alternaria* genus**

322 CAZymes (Carbohydrate-Active enZymes) are proteins involved in the degradation,  
323 rearrangement, or synthesis of glycosidic bonds. Plant pathogens secrete a diverse range of CAZymes that  
324 breakdown the complex polysaccharides in the plant cell wall. They consist of five distinct classes *viz.*  
325 Glycoside hydrolases (GH), Glycosyltransferases (GT), Polysaccharide lyases (PL), Carbohydrate  
326 esterases (CE), and Carbohydrate-binding modules (CBM). We identified > 500 CAZymes in the six  
327 *Alternaria spp.* including *A. brassicae* (Supplementary Table 5). The CAZyme distribution of *A. brassicae*  
328 and *A. brassicicola* varied from those of the other *Alternaria spp.* thus forming a separate cluster (Figure  
329 5). The number of auxiliary activity enzymes or the enzymes involved in plant cell wall degradation varied  
330 considerably between the different genera compared. Nearly 46% of the CAZymes in *A. brassicae* were  
331 secreted out of which ~17% were predicted to be effectors. Eight of the CAZy families were exclusively  
332 found in the *Alternaria* genus but not in the *Cochliobolus* and *Zymoseptoria* genus whereas there was a  
333 complete absence of GH39 family in all the *Alternaria* species but present in the other two genera. The  
334 AA9 family (formerly GH61; copper-dependent lytic polysaccharide monoxygenases) is significantly  
335 enlarged in comparison to the other CAZy families in the *Alternaria* and *Cochliobolus* genera with each  
336 species containing > 20 copies of the gene. The copy numbers in the *Alternaria spp.* are much higher than  
337 the copy numbers reported for *Botrytis* and *Fusarium spp.*<sup>46</sup>. The AA9 family is involved in the  
338 degradation of cell-wall polysaccharides and are known to act on a range of polysaccharides including  
339 starch, xyloglucan, cellodextrins, and glucomannan. LPMOs have been hypothesized to have a dual role –  
340 directly cleaving the cell -wall polysaccharides, and acting as a ROS generator and thus contributing to the

341 oxidative stress leading to necrosis in the plant tissues<sup>47,48</sup>. Strikingly, 11 of the 26 AA9 proteins present in  
342 *A. brassicae* are predicted to be secreted effectors. Characterisation of these CAZymes and their role in  
343 pathogenesis could be the subject of further studies.

## 344 **9. Overlapping effector profiles within the *Alternaria* genus**

345 We predicted the effector repertoire of six *Alternaria* species (Table 1) including *A. brassicae*  
346 using the pipeline described in the methods section. Most of the small secreted proteins predicted to be  
347 effectors were uncharacterised/predicted proteins and thus may be novel species or genus-specific  
348 effectors. *A. brassicae* had the largest proportion of unknown/predicted/hypothetical proteins in the set of  
349 candidate effectors (Supplementary Table 6). We found that most of the effectors between the six species  
350 to be common and overlapping, suggesting that the broad mechanisms of pathogenesis involving  
351 proteinaceous effectors may be conserved within the genus. However, we found two copies of a  
352 beta/gamma-crystallin fold containing protein to be present only in *A. brassicae* and *A. brassicicola* and  
353 not in the other four *Alternaria* species. A further search through the nr database of NCBI revealed that this  
354 protein was completely absent in the *Alternaria* genus and the closest matches were found in other plant  
355 pathogens viz. *Macrophomina* and *Fusarium* species. However, no information is available as to its  
356 function or role in pathogenicity in any of the species.

357 We could also establish that some of the effectors in *A. brassicae* have the potential to evolve  
358 adaptively since they were also significantly associated with the repeat-rich regions of the genome (P-  
359 value: 0.0003; Z-score: -2.8778). Population-level analyses are therefore required to identify the effectors  
360 under positive selection, which could shed light on the evolution of pathogenicity in *A. brassicae*.

361 The effectors identified in this study reveal the wide range of proteins that may be involved in the  
362 pathogenesis of *A. brassicae*. 39 of these effectors were predicted to be CAZymes having various roles in  
363 the degradation of the cell wall and associated polysaccharides. The genome of *A. brassicae* contained two  
364 necrosis and ethylene-inducing peptide (NEP) proteins, which have been implicated in the pathogenesis of  
365 various pathogens including oomycetes and necrotrophs<sup>49-51</sup>. Hrip1 (Hypersensitive response inducing  
366 protein 1) from *A. alternata* has recently been shown to be recognized by MdNLR16 in a classical gene-  
367 for-gene manner, and deletion of Hrip1 from *A. alternata* enhances its virulence<sup>52</sup>. A Hrip1 homolog is  
368 also present in *A. brassicae*, but it is not predicted to be secreted outside the cell, although this needs to be  
369 verified experimentally. The presence of effectors which are recognized in a gene-for-gene manner opens  
370 up the possibility of identification of complementary R-genes in the host that can be utilized for  
371 developing resistant varieties or cultivars.

## 372 **Conclusions**

373 *A. brassicae* has an enormous economic impact on the cultivated *Brassica* species worldwide,  
374 particularly the oleiferous types. Using the recently published high-quality genome assembly of *A.*  
375 *brassicae*, we annotated the genome and carried out comparative analyses of *A. brassicae* with other  
376 *Alternaria* spp. to discern unique features of *A. brassicae* vis-à-vis the other *Alternaria* species. We  
377 sequenced and annotated the genomes of two *A. alternata* isolates that were co-infecting *B. juncea*. The  
378 two *A. alternata* isolates had a gene content, effector repertoire, and CAZyme profiles that were very

379 similar to that of an earlier sequenced *A. alternata* isolate (ATCC34957). This leads us to conclude that  
380 these isolates are opportunistic pathogens with a limited ability to cause infection on their own but would  
381 contribute overall to the disease outcome of a primary *A. brassicae* infection. Additionally, we show the  
382 presence of a dispensable chromosome in *A. brassicae*, a large-spored *Alternaria* species for the first time.  
383 The implications of a lineage-specific dispensable chromosome in *A. brassicae* towards pathogenesis  
384 remains to be unravelled. We also described the CAZyme profiles of nearly 30 *Dothideomycetes* and show  
385 that the CAZyme profiles of *A. brassicae* and *A. brassicicola* are different from the other *Alternaria*  
386 species. We also identified several important secondary metabolite gene clusters with putative roles in  
387 pathogenicity. The identification of the biosynthetic cluster responsible for Destruxin B in *A. brassicae*  
388 paves the way for reverse genetics studies to conclusively determine the contribution of Destruxin B  
389 towards the pathogenicity of *A. brassicae*. The repertoire of effectors identified in the six *Alternaria*  
390 species was largely overlapping. It may thus be hypothesised that host-specificity in the *Alternaria* species  
391 may be conferred by the combined action of proteinaceous effectors and the secondary metabolite toxins.  
392 Future studies would involve characterisation of the effectors and secondary metabolite clusters identified  
393 in this study and elucidating their role in pathogenesis.

394

#### 395 **Availability:**

396 The genome assembly and associated raw data generated in this study have been deposited as National  
397 Center for Biotechnology Information BioProject PRJNA548052 and PRJNA548054.

398

#### 399 **Acknowledgements:**

400 This work was supported by the grants from the Department of Biotechnology (DBT), Government of  
401 India, under the projects BT/IN/Indo-UK/CGAT/12/DP/2014-15 and BT/01/NDDDB/UDSC/2016.

402

## References

1. Nowicki, M., Nowakowska, M., Niezgoda, A. and Kozik, E. 2012, *Alternaria* Black Spot of Crucifers: Symptoms, Importance of Disease, and Perspectives of Resistance Breeding. **76**, 5.
2. Sharma, G., Dinesh Kumar, V., Haque, A., Bhat, S. R., Prakash, S. and Chopra, V. L. 2002, *Brassica* coenospecies: a rich reservoir for genetic resistance to leaf spot caused by *Alternaria brassicae*. *Euphytica*, **125**, 411-417.
3. Nishimura, S. and Kohmoto, K. 1983, Host-specific toxins and chemical structures from *Alternaria* species. *Annu Rev Phytopathol*, **21**, 87-116.
4. Akagi, Y., Akamatsu, H., Otani, H. and Kodama, M. 2009, Horizontal chromosome transfer, a mechanism for the evolution and differentiation of a plant-pathogenic fungus. *Eukaryot Cell*, **8**, 1732-1738.
5. Bains, P. S. and Tewari, J. P. 1987, Purification, chemical characterization and host-specificity of the toxin produced by *Alternaria brassicae*. *Physiological and Molecular Plant Pathology*, **30**, 259-271.
6. Buchwaldt, L. and Green, H. 1992, Phytotoxicity of destruxin B and its possible role in the pathogenesis of *Alternaria brassicae*. *Plant Pathology*, **41**, 55-63.
7. Parada, R. Y., Sakuno, E., Mori, N., et al. 2008, *Alternaria brassicae* produces a host-specific protein toxin from germinating spores on host leaves. *Phytopathology*, **98**, 458-463.
8. Woudenberg, J. H., Groenewald, J. Z., Binder, M. and Crous, P. W. 2013, *Alternaria* redefined. *Stud Mycol*, **75**, 171-212.
9. Thomma, B., Seidl, M. F., Shi-Kunne, X., et al. 2016, Mind the gap; seven reasons to close fragmented genome assemblies. *Fungal Genet Biol*, **90**, 24-30.
10. Rajarammohan, S., Pental, D. and Kaur, J. 2019, Near-complete genome assembly of *Alternaria brassicae* - a necrotrophic pathogen of Brassica crops. *Mol Plant Microbe Interact*.
11. Belmas, E., Briand, M., Kwasiborski, A., et al. 2018, Genome Sequence of the Necrotrophic Plant Pathogen *Alternaria brassicicola* Abra43. *Genome Announc*, **6**.
12. Nguyen, H. D., Lewis, C. T., Levesque, C. A. and Grafenhan, T. 2016, Draft Genome Sequence of *Alternaria alternata* ATCC 34957. *Genome Announc*, **4**.
13. Wolters, P. J., Faino, L., van den Bosch, T. B. M., et al. 2018, Gapless Genome Assembly of the Potato and Tomato Early Blight Pathogen *Alternaria solani*. *Mol Plant Microbe Interact*, **31**, 692-694.
14. Koren, S., Walenz, B. P., Berlin, K., Miller, J. R., Bergman, N. H. and Phillippy, A. M. 2017, Canu: scalable and accurate long-read assembly via adaptive k-mer weighting and repeat separation. *Genome Res*, **27**, 722-736.
15. Dobin, A. and Gingeras, T. R. 2015, Mapping RNA-seq Reads with STAR. *Curr Protoc Bioinformatics*, **51**, 11.14.11-19.
16. Trapnell, C., Roberts, A., Goff, L., et al. 2012, Differential gene and transcript expression analysis of RNA-seq experiments with TopHat and Cufflinks. *Nat Protoc*, **7**, 562-578.

17. Haas, B. J., Papanicolaou, A., Yassour, M., et al. 2013, De novo transcript sequence reconstruction from RNA-seq using the Trinity platform for reference generation and analysis. *Nat Protoc*, **8**, 1494-1512.
18. Haas, B. J., Salzberg, S. L., Zhu, W., et al. 2008, Automated eukaryotic gene structure annotation using EVIDENCEModeler and the Program to Assemble Spliced Alignments. *Genome Biol*, **9**, R7.
19. Stanke, M., Schoffmann, O., Morgenstern, B. and Waack, S. 2006, Gene prediction in eukaryotes with a generalized hidden Markov model that uses hints from external sources. *BMC Bioinformatics*, **7**, 62.
20. Ter-Hovhannisyanyan, V., Lomsadze, A., Chernoff, Y. O. and Borodovsky, M. 2008, Gene prediction in novel fungal genomes using an ab initio algorithm with unsupervised training. *Genome Res*, **18**, 1979-1990.
21. Keilwagen, J., Wenk, M., Erickson, J. L., Schattat, M. H., Grau, J. and Hartung, F. 2016, Using intron position conservation for homology-based gene prediction. *Nucleic Acids Res*, **44**, e89.
22. Blin, K., Wolf, T., Chevrette, M. G., et al. 2017, antiSMASH 4.0-improvements in chemistry prediction and gene cluster boundary identification. *Nucleic Acids Res*, **45**, W36-W41.
23. Petersen, T. N., Brunak, S., von Heijne, G. and Nielsen, H. 2011, SignalP 4.0: discriminating signal peptides from transmembrane regions. *Nat Methods*, **8**, 785-786.
24. Krogh, A., Larsson, B., von Heijne, G. and Sonnhammer, E. L. 2001, Predicting transmembrane protein topology with a hidden Markov model: application to complete genomes. *J Mol Biol*, **305**, 567-580.
25. Sperschneider, J., Gardiner, D. M., Dodds, P. N., et al. 2016, EffectorP: predicting fungal effector proteins from secretomes using machine learning. *New Phytol*, **210**, 743-761.
26. Emms, D. M. and Kelly, S. 2015, OrthoFinder: solving fundamental biases in whole genome comparisons dramatically improves orthogroup inference accuracy. *Genome Biol*, **16**, 157.
27. Gel, B., Diez-Villanueva, A., Serra, E., Buschbeck, M., Peinado, M. A. and Malinverni, R. 2016, regioneR: an R/Bioconductor package for the association analysis of genomic regions based on permutation tests. *Bioinformatics*, **32**, 289-291.
28. Liao, M., Chen, C. and Li, Q. 2017, The complete mitochondrial genome of *Alternaria alternata* (Hypocreales: Nectriaceae). *Mitochondrial DNA Part B*, **2**, 587-588.
29. Salichos, L., and Rokas, A. 2013, Inferring ancient divergences requires genes with strong phylogenetic signals. *Nature*, **497**, 327-331.
30. Dong, S., Raffaele, S. and Kamoun, S. 2015, The two-speed genomes of filamentous pathogens: waltz with plants. *Curr Opin Genet Dev*, **35**, 57-65.
31. Hu, J., Chen, C., Peever, T., Dang, H., Lawrence, C. and Mitchell, T. 2012, Genomic characterization of the conditionally dispensable chromosome in *Alternaria arborescens* provides evidence for horizontal gene transfer. *BMC Genomics*, **13**, 171.



32. Armitage, A. D., Cockerton, H. M., Sreenivasaprasad, S., et al. 2019, Genomics, evolutionary history and diagnostics of the *Alternaria alternata* species group including apple and Asian pear pathotypes. *bioRxiv*, 534685.
33. Giuliano Garisto Donzelli, B., Krasnoff, S. B., Moon, Y. S., Churchill, A. C. and Gibson, D. M. 2012, Genetic basis of destruxin production in the entomopathogen *Metarhizium robertsii*. *Curr Genet*, **58**, 105-116.
34. Venkatasubbaiah, P., Tisserat, N. A. and Chilton, W. S. 1994, Metabolites of *Ophiosphaerella herpotricha*, a cause of spring dead spot of bermudagrass. *Mycopathologia*, **128**, 155-159.
35. Wang, B., Kang, Q., Lu, Y., Bai, L. and Wang, C. 2012, Unveiling the biosynthetic puzzle of destruxins in *Metarhizium* species. *Proc Natl Acad Sci U S A*, **109**, 1287-1292.
36. Oide, S., Moeder, W., Krasnoff, S., et al. 2006, NPS6, encoding a nonribosomal peptide synthetase involved in siderophore-mediated iron metabolism, is a conserved virulence determinant of plant pathogenic ascomycetes. *Plant Cell*, **18**, 2836-2853.
37. Walton, J. D. 2006, HC-toxin. *Phytochemistry*, **67**, 1406-1413.
38. Wight, W. D., Labuda, R. and Walton, J. D. 2013, Conservation of the genes for HC-toxin biosynthesis in *Alternaria jesenskae*. *BMC Microbiol*, **13**, 165.
39. Kimura, N. and Tsuge, T. 1993, Gene cluster involved in melanin biosynthesis of the filamentous fungus *Alternaria alternata*. *J Bacteriol*, **175**, 4427-4435.
40. Cho, Y., Srivastava, A., Ohm, R. A., et al. 2012, Transcription factor Amr1 induces melanin biosynthesis and suppresses virulence in *Alternaria brassicicola*. *PLoS Pathog*, **8**, e1002974.
41. Howard, R. J. and Valent, B. 1996, Breaking and entering: host penetration by the fungal rice blast pathogen *Magnaporthe grisea*. *Annu Rev Microbiol*, **50**, 491-512.
42. Fry, W., Yoder, O. and Apple, A. 1984, Influence of naturally occurring marker genes on the ability of *Cochliobolus heterostrophus* to induce field epidemics of southern corn leaf blight. *Phytopathology*, **74**, 175-178.
43. Tanabe, K., Park, P., Tsuge, T., Kohmoto, K. and Nishimura, S. 1995, Characterization of the mutants of *Alternaria alternata* Japanese pear pathotype deficient in melanin production and their pathogenicity. *Ann. Phytopathol. Soc. Jpn.*, **61**, 27-33.
44. Akamatsu, H., Taga, M., Kodama, M., Johnson, R., Otani, H. and Kohmoto, K. 1999, Molecular karyotypes for *Alternaria* plant pathogens known to produce host-specific toxins. *Curr Genet*, **35**, 647-656.
45. Johnson, L. J., Johnson, R. D., Akamatsu, H., et al. 2001, Spontaneous loss of a conditionally dispensable chromosome from the *Alternaria alternata* apple pathotype leads to loss of toxin production and pathogenicity. *Curr Genet*, **40**, 65-72.
46. Johansen, K. S. 2016, Lytic Polysaccharide Monooxygenases: The Microbial Power Tool for Lignocellulose Degradation. *Trends Plant Sci*, **21**, 926-936.
47. Amselem, J., Cuomo, C. A., van Kan, J. A., et al. 2011, Genomic analysis of the necrotrophic fungal pathogens *Sclerotinia sclerotiorum* and *Botrytis cinerea*. *PLoS Genet*, **7**, e1002230.



48. Simon, U. K., Polanschutz, L. M., Koffler, B. E. and Zechmann, B. 2013, High resolution imaging of temporal and spatial changes of subcellular ascorbate, glutathione and H<sub>2</sub>O<sub>2</sub> distribution during *Botrytis cinerea* infection in *Arabidopsis*. *PLoS One*, **8**, e65811.
49. Bae, H., Kim, M. S., Sicher, R. C., Bae, H. J. and Bailey, B. A. 2006, Necrosis- and ethylene-inducing peptide from *Fusarium oxysporum* induces a complex cascade of transcripts associated with signal transduction and cell death in *Arabidopsis*. *Plant Physiol*, **141**, 1056-1067.
50. Oome, S. and Van den Ackerveken, G. 2014, Comparative and functional analysis of the widely occurring family of Nep1-like proteins. *Mol Plant Microbe Interact*, **27**, 1081-1094.
51. Qutob, D., Kemmerling, B., Brunner, F., et al. 2006, Phytotoxicity and innate immune responses induced by Nep1-like proteins. *Plant Cell*, **18**, 3721-3744.
52. Meng, D., Li, C., Park, H. J., et al. 2018, Sorbitol Modulates Resistance to *Alternaria alternata* by Regulating the Expression of an NLR Resistance Gene in Apple. *Plant Cell*, **30**, 1562-1581.

**Table 1:** Assembly statistics of the six near-complete *Alternaria* genome sequences

|                                           | <i>A. brassicae</i><br>J3 <sup>10</sup> | <i>A. alternata</i><br>PN1 | <i>A. alternata</i><br>PN2 | <i>A. solani</i><br>altNL03003 <sup>13</sup> | <i>A. brassicicola</i><br>abra43 <sup>11</sup> | <i>A. alternata</i><br>ATCC34957 <sup>12</sup> |
|-------------------------------------------|-----------------------------------------|----------------------------|----------------------------|----------------------------------------------|------------------------------------------------|------------------------------------------------|
| <b>Assembly size (Mb)</b>                 | 34.14                                   | 33.77                      | 33.53                      | 32.78                                        | 31.04                                          | 33.48                                          |
| <b>No. of contigs</b>                     | 17                                      | 14                         | 15                         | 10                                           | 29                                             | 27                                             |
| <b>No. of contigs<br/>( &gt;10000 bp)</b> | 17                                      | 13                         | 15                         | 10                                           | 29                                             | 25                                             |
| <b>Largest contig (Mb)</b>                | 7.1                                     | 6.86                       | 6.76                       | 6.94                                         | 3.3                                            | 3.96                                           |
| <b>N50</b>                                | 2.98                                    | 3.09                       | 3.1                        | 2.87                                         | 2.1                                            | 2.83                                           |
| <b>GC (%)</b>                             | 50.7                                    | 50.98                      | 50.95                      | 51.32                                        | 50.85                                          | 50.95                                          |
| <b>Repeat content (%)</b>                 | 9.33                                    | 2.43                       | 2.64                       | 5.71                                         | 9.3                                            | 2.71                                           |
| <b>Predicted genes</b>                    | 11593                                   | 11495                      | 11387                      | 11804                                        | 10261                                          | 12500                                          |

**Table 2:** Comparison of characteristics of Core chromosomes and dispensable chromosome of *A. brassicae*

| Characteristic                             | Core chromosomes | DC largest contig (ABRSC11) | DC contigs (all) |
|--------------------------------------------|------------------|-----------------------------|------------------|
| Total length (bp)                          | 32140555         | 997589                      | 1809659          |
| G+C (%)                                    | 50.85            | 50.42                       | 47               |
| Number of protein-coding genes             | 11216            | 238                         | 377              |
| Proportion of genes by length (%)          | 52.48            | 30.86                       | 30.05            |
| Number of Transposable element (TE) copies | 1454             | 181                         | 313              |
| Proportion of TEs by length (%)            | 5.78             | 21.45                       | 20.89            |
| Proportion of secreted protein genes (%)   | 10.09            | 9.66                        | 9.81             |
| Proportion of effector genes (%)           | 1.69             | 2.52                        | 2.39             |

## Figure legends

**Figure 1: Summary of *A. brassicae* genome,** (From outer to inner circular tracks) A) pseudochromosomes/scaffolds, B) Protein-coding genes, B) Repeat elements, D) Transposable Elements (DNA and LTR), E) predicted secondary metabolite clusters, F) Secreted proteins, G) predicted effectors.

**Figure 2: Phylogenetic tree of *Alternaria* species with *S. lycopersici* as an outgroup.** The tree was constructed using 29 single copy orthologs, which had the highest phylogenetic signal as calculated in Mirlo.

**Figure 3: Comparison of repeat content in six *Alternaria* species.** The size of the bubbles corresponds to the A) percentage of transposable elements (TEs) in the genome, B) copy number of the TE in the genome.

**Figure 4: Synteny of the Destruxin B cluster in the six *Alternaria* species.** DtxS1 and DtxS3 are marked in red (labelled with respective gene IDs) and are absent from all the other *Alternaria* species.

**Figure 5: Heatmap of the CAZyme profiles in the 30 Dothideomycetes, which consists of the genera of *Alternaria*, *Cochliobolus*, and *Zymoseptoria*.** Both the CAZyme families and the organisms were clustered hierarchically. The clustering of the organisms closely resembles that of the species phylogeny except for *A. brassicae* and *A. brassicicola*, which cluster separately from the other *Alternaria* species.

## Supplementary Tables

**Supplementary Table 1:** The complete annotated gene set of *A. brassicae* with gene coordinates, gene description and functional classification

**Supplementary Table 2:** List of *Dothideomycetes* used in the orthology analysis

**Supplementary Table 3:** List of 460 *A. brassicae* species-specific proteins with gene coordinates and description

**Supplementary Table 4:** List of predicted secondary metabolite gene clusters in *A. brassicae* along with their constituent genes, coordinates in the genome, and their description.

**Supplementary Table 5:** Comparison of the CAZyme profiles of the 30 *Dothideomycetes* including 16 *Alternaria* species

**Supplementary Table 6:** List of predicted effectors of *A. brassicae*

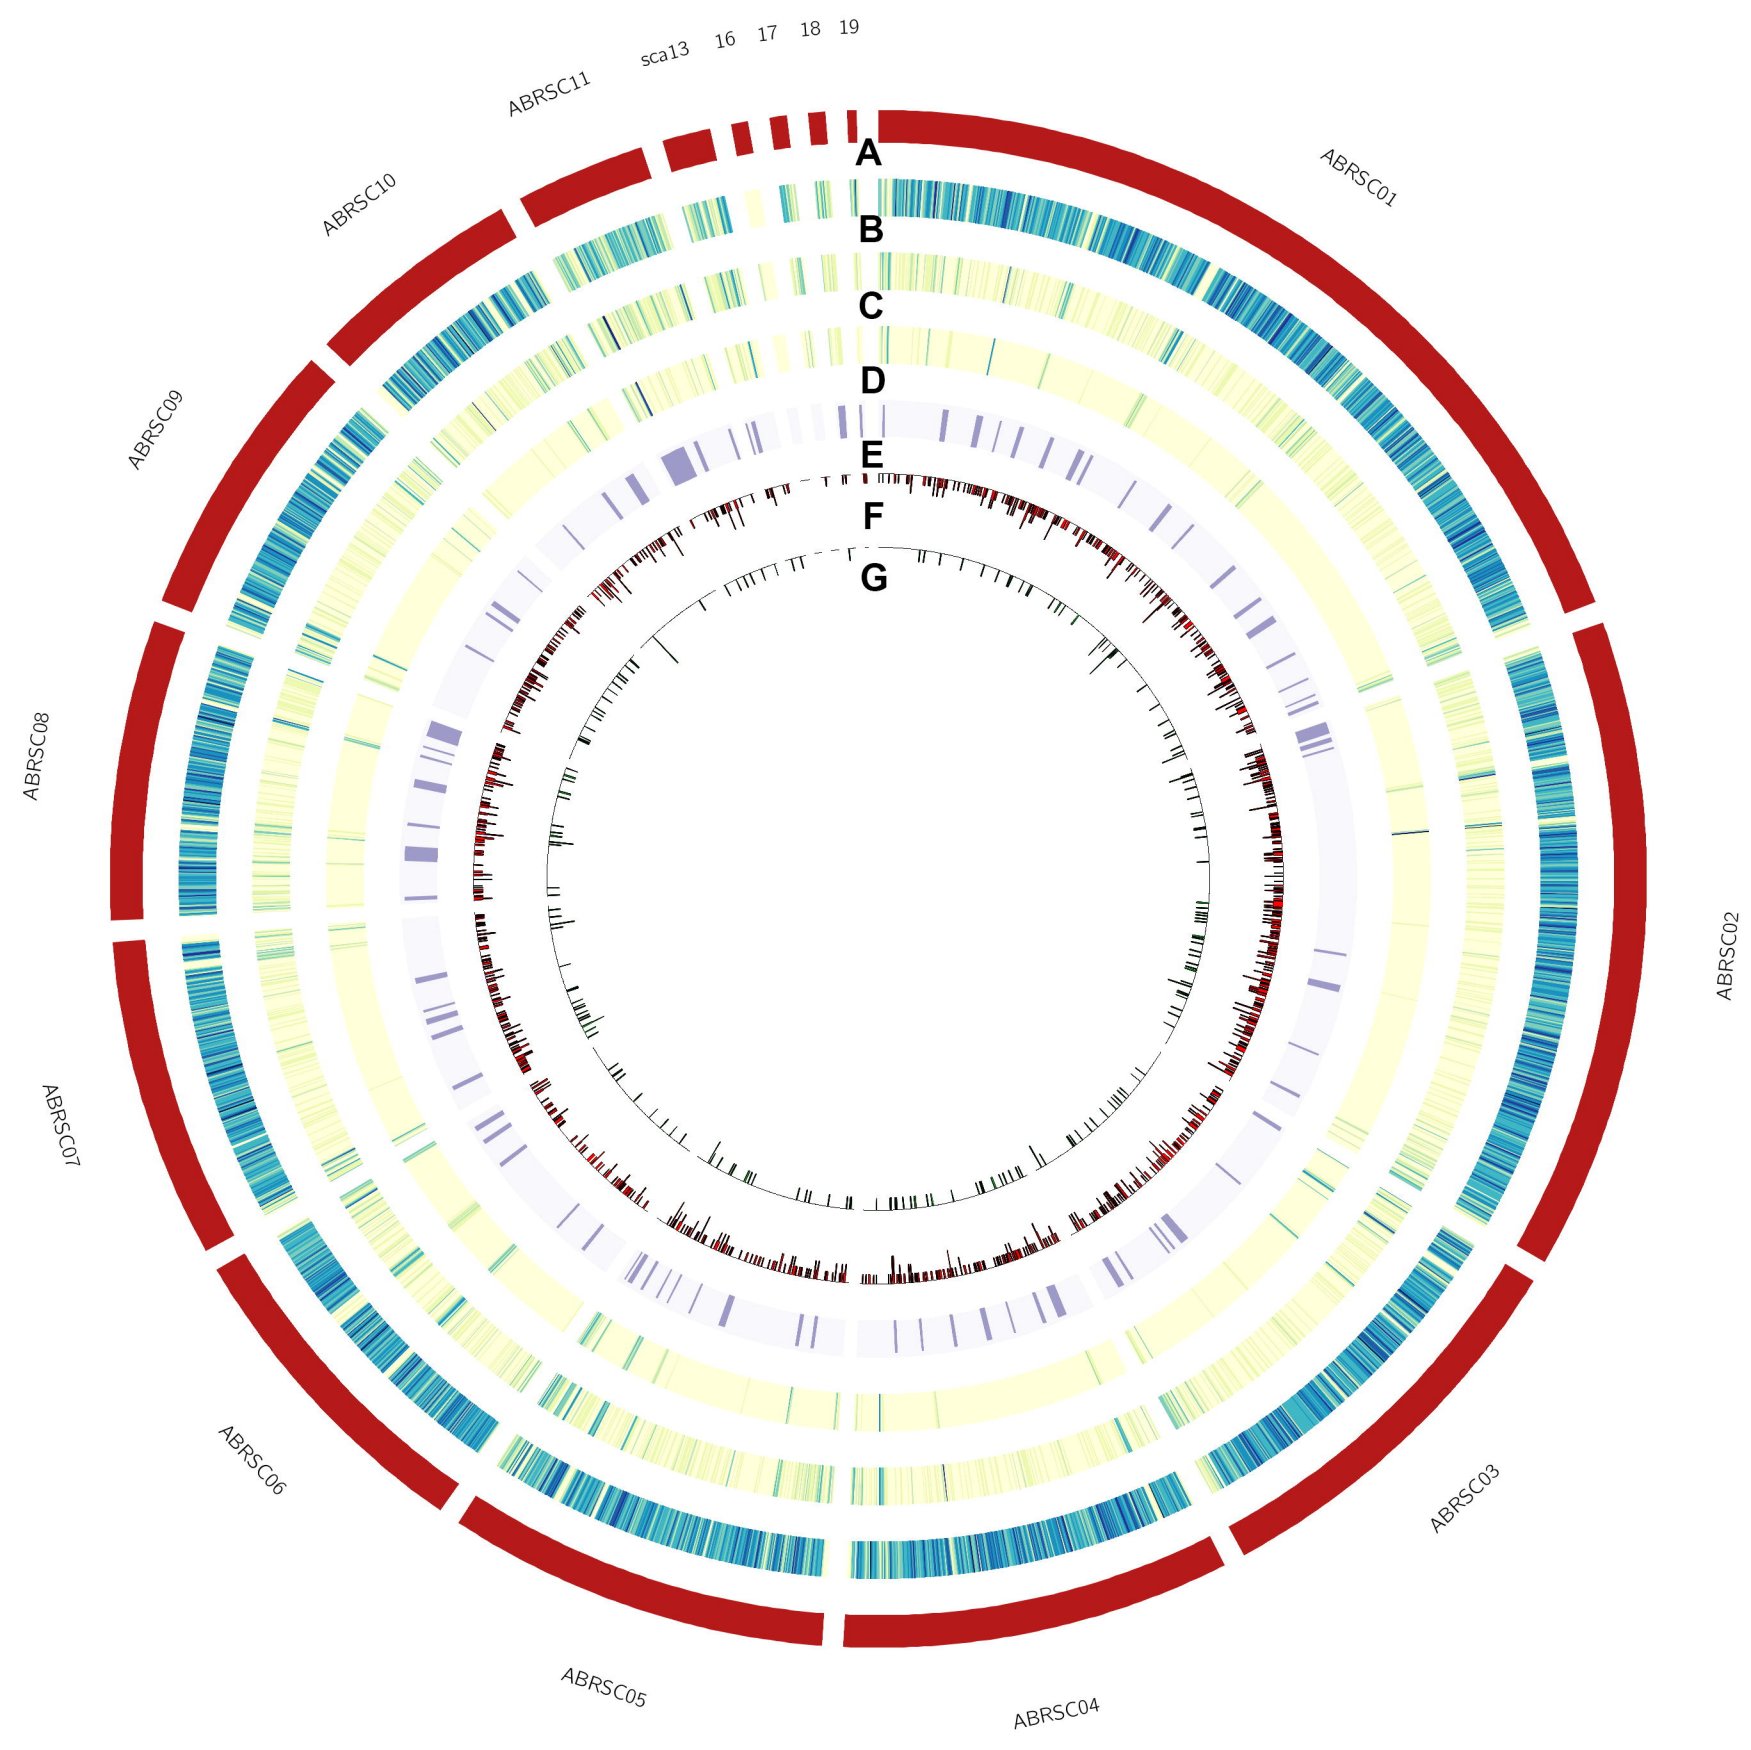

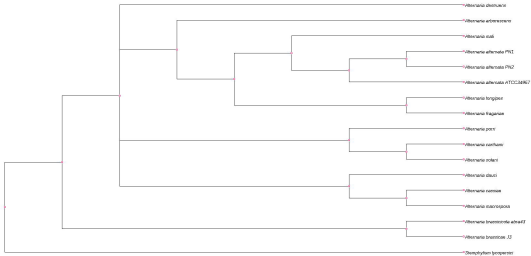



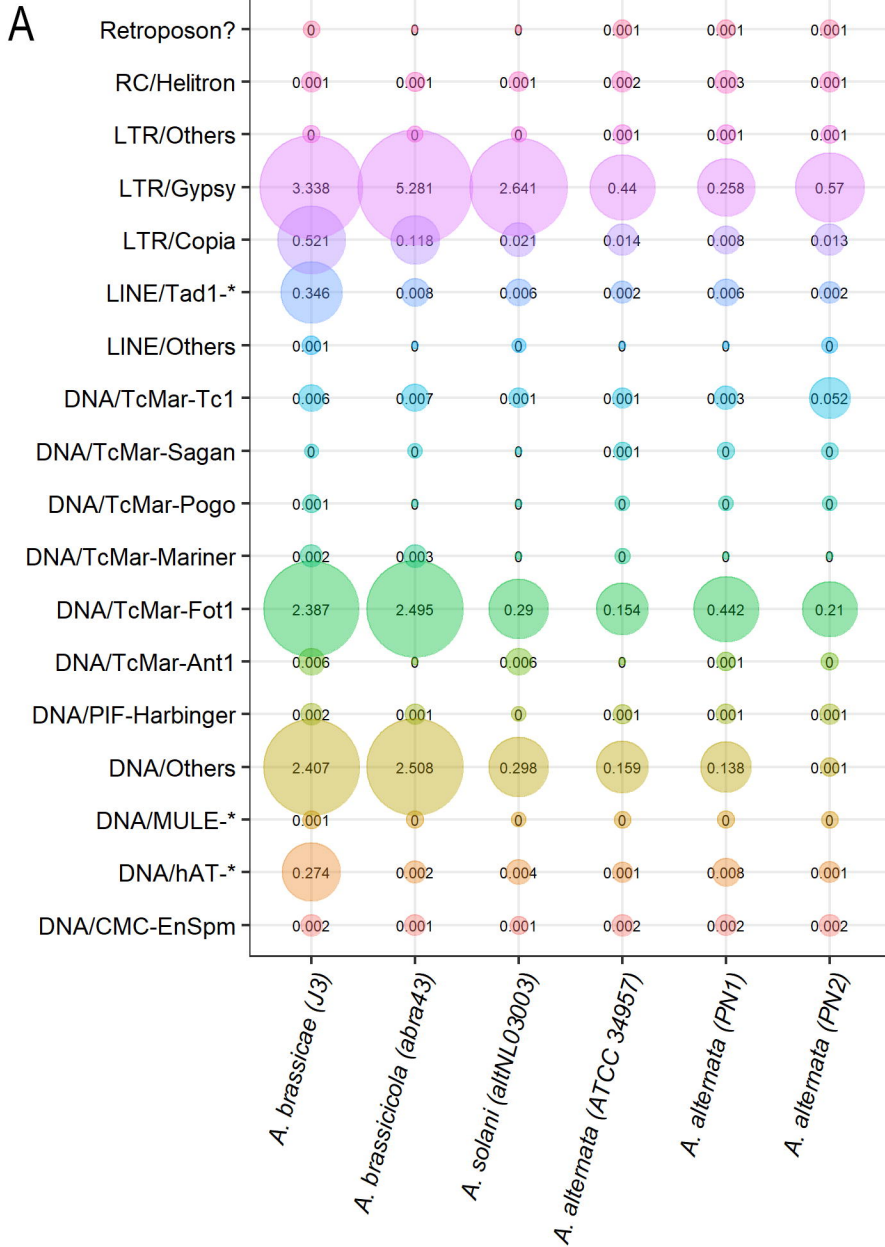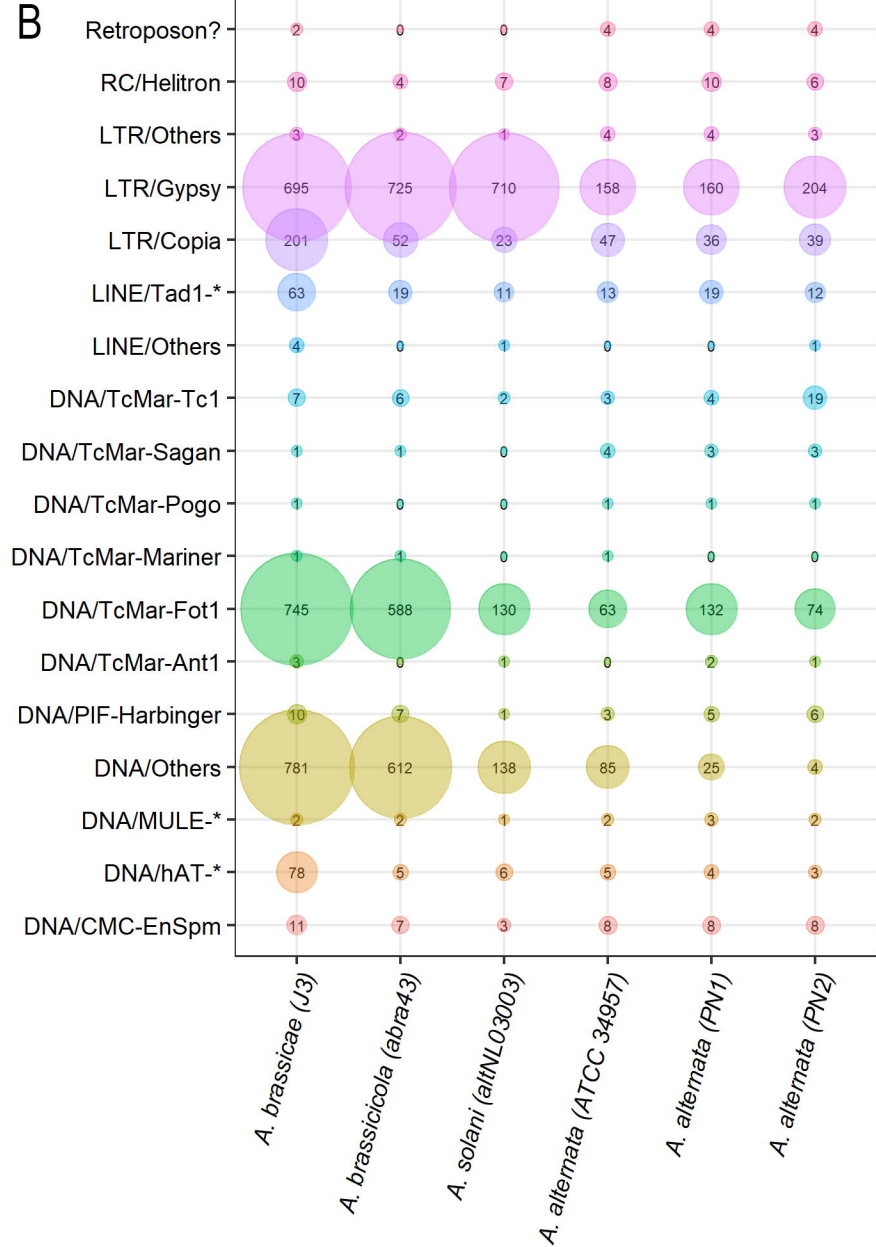

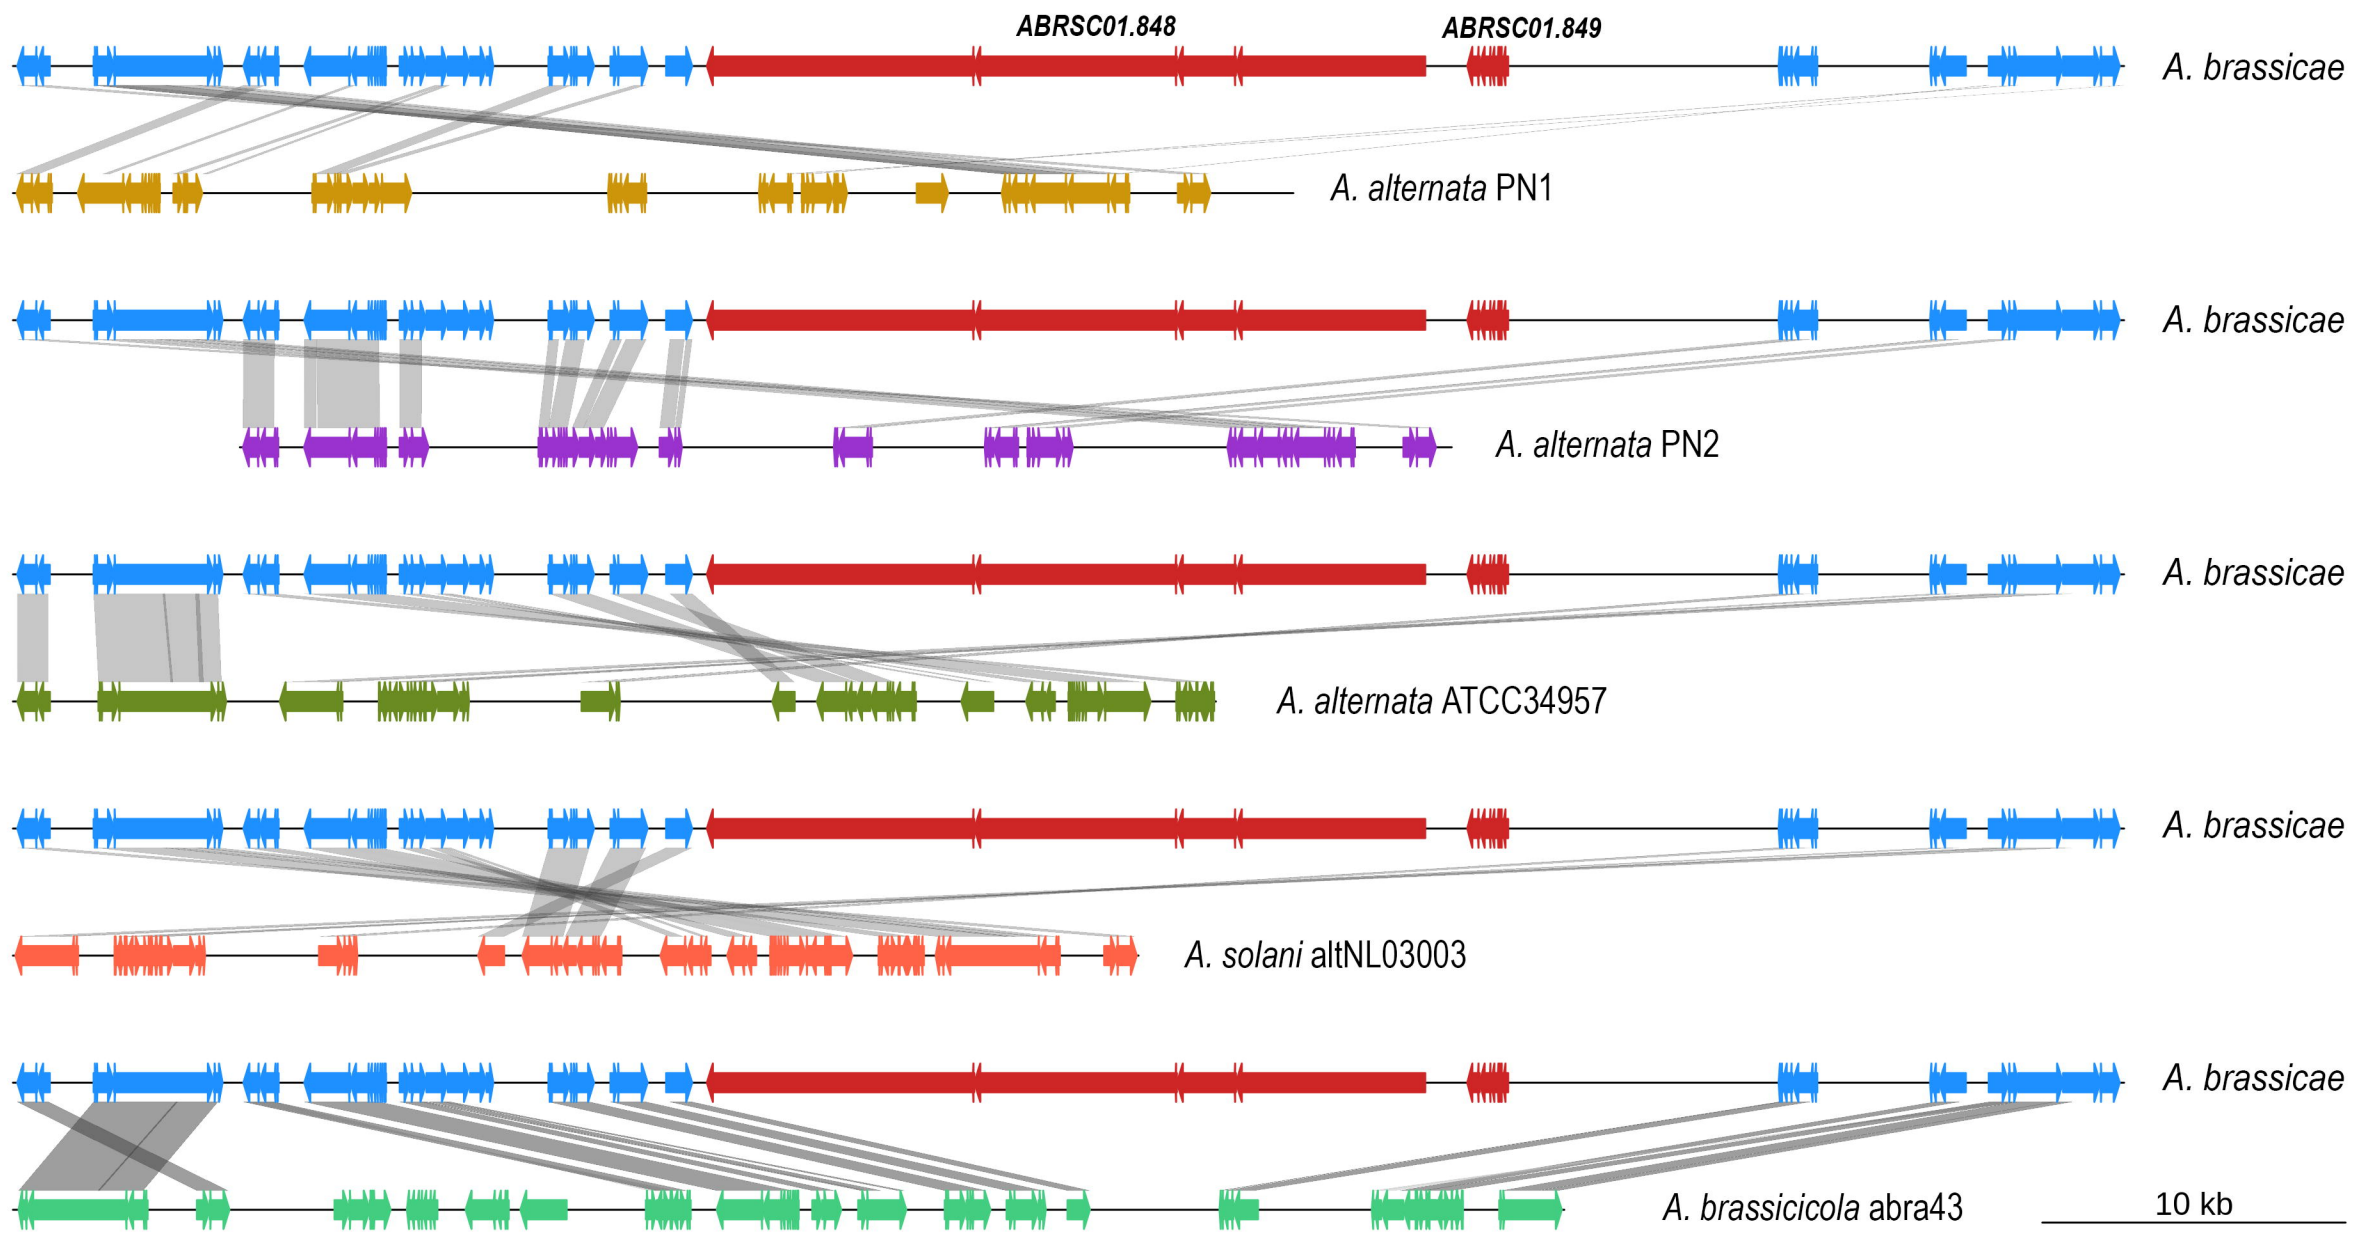

Source: https://www.biorxiv.org/content/10.1101/693929v1.full.pdf
